# Supplementary material for: Outcomes at follow-up of negative colonoscopy in average risk population: systematic review and meta-analysis
Source: PubMed Central journal article supplement — BMJ. 2019 Nov 13;367:l6109. doi: 10.1136/bmj.l6109 (PMC6853024; doi:10.1136/bmj.l6109), 2019-11-13
Supplement: heit051434.ww1.pdf [file heit051434.ww1.pdf]

## Supplementary Material

### Appendix 1: Search strategy

#### A | Pubmed

- 6 Search (#1 AND #2 AND #3 AND #4 AND #5)
- 5 Search (colonoscopy OR sigmoidoscopy OR ((colon OR colorectal) AND (endoscop\* OR examinat\*)))
- 4 Search ((screen\* OR examination) AND ("follow-up" OR repeat\* OR successive OR subsequent OR interval OR consecutive OR round))
- 3 Search (adenoma\* OR polyp\* OR "advanced neoplas\*" OR "serrate\*" OR "interval colorectal cancer" OR "interval cancer")
- 2 Search (carcinoma\*[title/abstract] OR cancer[title/abstract] OR cancers[title/abstract] OR cancerous[title/abstract] OR neoplas\*[title/abstract] OR adenoma\*[title/abstract] OR malignan\*[title/abstract] OR tumor\*[title/abstract] OR tumour\*[title/abstract])
- 1 Search (CRC[title/abstract] OR colorect\*[title/abstract] OR rectal[title/abstract] OR rectum[title/abstract] OR colon[title/abstract] OR colonic[title/abstract] OR bowel[title/abstract] OR intestin\*[title/abstract])

#### B | Web of Science

- 6 #1 AND #2 AND #3 AND #4 AND #5  
Indexes=SCI-EXPANDED Timespan=All years
- 5 ALL=(colonoscopy OR sigmoidoscopy OR ((colon OR colorectal) AND (endoscop\* OR examinat\*)))  
Indexes=SCI-EXPANDED Timespan=All years
- 4 ALL=((screen\* OR examination) AND ("follow-up" OR repeat\* OR successive OR subsequent OR interval OR consecutive OR round))  
Indexes=SCI-EXPANDED Timespan=All years
- 3 ALL=(adenoma\* OR polyp\* OR "advanced neoplas\*" OR "serrate\*" OR "interval colorectal cancer" OR "interval cancer")  
Indexes=SCI-EXPANDED Timespan=All years
- 2 ALL=(carcinoma\* OR cancer OR cancers OR cancerous OR neoplas\* OR adenoma\* OR malignan\* OR tumor\* OR tumour\*)  
Indexes=SCI-EXPANDED Timespan=All years
- 1 ALL=(CRC OR colorect\* OR rectal OR rectum OR colon OR colonic OR bowel OR intestin\*)  
Indexes=SCI-EXPANDED Timespan=All years

**C | EMBASE**

- 6 #1 AND #2 AND #3 AND #4 AND #5
- 5 colonoscopy OR sigmoidoscopy OR ((colon OR colorectal) AND (endoscop\* OR examinat\*))
- 4 (screen\* OR examination) AND ('follow-up' OR repeat\* OR successive OR subsequent OR interval OR consecutive OR round)
- 3 adenoma\* OR polyp\* OR 'advanced neoplas\*' OR 'serrate\*' OR 'interval colorectal cancer' OR 'interval cancer'
- 2 carcinoma\* OR cancer OR cancers OR cancerous OR neoplas\* OR adenoma\* OR malignan\* OR tumor\* OR tumour\*
- 1 crc OR colorect\* OR rectal OR 'rectum'/exp OR 'colon'/exp OR colonic OR 'bowel'/exp OR intestin\*

Supplementary table A | **Reporting of findings**

| <b>Most advanced finding</b> | <b>Definition</b>                                                                                                                                                                                                                                                                                                                                                                                                          | <b>Surrogate</b>                                                                                                                                                                                       |
|------------------------------|----------------------------------------------------------------------------------------------------------------------------------------------------------------------------------------------------------------------------------------------------------------------------------------------------------------------------------------------------------------------------------------------------------------------------|--------------------------------------------------------------------------------------------------------------------------------------------------------------------------------------------------------|
| No finding                   | No polyps.                                                                                                                                                                                                                                                                                                                                                                                                                 |                                                                                                                                                                                                        |
| Non-neoplastic polyps        | At least one polyp with: <ul style="list-style-type: none"> <li>- Hyperplastic <b>or</b> inflammatory <b>or</b> hamartomatous pathophysiology</li> </ul>                                                                                                                                                                                                                                                                   | At least one polyp <6 mm (for index colonoscopy: not removed)<br>OR<br>At least one hyperplastic polyp<br>OR<br>At least one benign polyp not otherwise specified<br>OR<br>Polyps of unknown histology |
| Non-advanced adenomas        | At least one conventional adenoma with: <ul style="list-style-type: none"> <li>- 6-9 mm of size <b>and</b></li> <li>- Tubular histology <b>and</b></li> <li>- Low-grade dysplasia</li> </ul> <b>OR</b><br>At least one sessile serrated adenoma (any histology) with: <ul style="list-style-type: none"> <li>- 6-9 mm of size <b>and</b></li> <li>- low-grade dysplasia</li> </ul> <p>also includes 1-2 small adenomas</p> | At least one polyp 6-9 mm<br><br>OR<br><br>At least one conventional adenoma (if not further defined)                                                                                                  |
| Advanced adenomas            | At least one conventional adenoma with: <ul style="list-style-type: none"> <li>- &gt;9 mm of size <b>or</b></li> <li>- villous or tubulovillous histology, <b>or</b></li> <li>- high-grade dysplasia</li> </ul> <b>OR</b><br>At least one sessile serrated adenoma (any histology) with: <ul style="list-style-type: none"> <li>- &gt;9 mm of size <b>or</b></li> <li>- high-grade dysplasia</li> </ul>                    | At least one polyp >9mm<br><br>OR<br><br>At least one advanced conventional adenoma (if not further defined)<br><br>OR<br>>= 3 non-advanced adenomas (<10 mm, tubular histology, low-grade dysplasia)  |
| Colorectal cancer            | Invasive malignant neoplasms (beyond muscularis mucosa) / carcinomas                                                                                                                                                                                                                                                                                                                                                       |                                                                                                                                                                                                        |

Supplementary table B | Overview of studies on follow-up colonoscopy after negative index colonoscopy: study characteristics

| First author, Year            | Country / Region | Study type      | Setting                                                           | Study Period | N    | Age at index colonoscopy (years) |      | Age at follow-up colonoscopy (years) |      | Ethnicity (% Caucasian) | Male (%) | Family history (%) | Average risk screening indication |           | Interval between procedures (years) |      |                                                                  |
|-------------------------------|------------------|-----------------|-------------------------------------------------------------------|--------------|------|----------------------------------|------|--------------------------------------|------|-------------------------|----------|--------------------|-----------------------------------|-----------|-------------------------------------|------|------------------------------------------------------------------|
|                               |                  |                 |                                                                   |              |      | Mean                             | SD   | Mean                                 | SD   |                         |          |                    | Index                             | Follow-Up | Mean                                | SD   | Range                                                            |
| Park, 2015 <sup>34</sup>      | Korea            | Cohort          | Asan Medical Centre, Seoul                                        | 2001 to 2011 | 1992 | 52.5*                            | 7.6* | 54.6                                 | 7.5  | Asian                   | 82%      | 5%                 | mixed                             | mixed     | 2.1                                 | 1.3* | NR                                                               |
| de Jong, 2005 <sup>23</sup>   | Netherlands      | Cross-sectional | Noncarrier in FAP and HNPCC families (countrywide), registry data | 1987 to 2003 | 162  | 37.4                             | 10.2 | 39.9*                                | NR   | Caucasian               | 50%      | NR                 | majority                          | majority  | 2.5                                 | NR   | 0.3 to 10.1                                                      |
| Avidan, 2002 <sup>20</sup>    | USA              | Cohort          | Hines Veteran Affairs Hospital                                    | 1987 to 2002 | 391  | 65.6*                            | 8.6* | 68.2*                                | 8.5* | 78%*                    | 99%      | 45%                | majority                          | majority  | 2.6*                                | 1.4* | 1 to 5                                                           |
| Kim, 2014 <sup>26</sup>       | Korea            | Cross-sectional | Soonchunhyang University Hospital, Seoul                          | 2003 to 2011 | 512  | 52.0                             | 8.8  | 54.7*                                | 8.9* | Asian                   | 54% †    | NR                 | mixed                             | mixed     | 2.7                                 | 1.6  | NR to 7<br>Interval subgroups‡:<br>NR NR NR to 5<br>NR NR 5 to 7 |
| Suh, 2014 <sup>40</sup>       | Korea            | Cohort          | Korea University Ansan Hospital                                   | 2002 to 2012 | 360  | 47.6*                            | 8.5* | 50.2*                                | 8.5* | Asian                   | 67%      | NR                 | majority                          | mixed     | 2.8*                                | 1.3* | NR<br>Interval subgroup¶:<br>5.4* 1.8* NR                        |
| Neugut, 1995 <sup>33</sup>    | USA              | Case-Control    | Three colonoscopy practices in New York City                      | 1986 to 1991 | 99   | 58.0                             | NR   | 60.8*                                | NR   | 92%                     | 47% †    | 37%                | mixed                             | mixed     | 2.8                                 | NR   | 0.5 to 5.4                                                       |
| Yamaji, 2004 <sup>42</sup>    | Japan            | Cohort          | Kameda General Hospital and Makuhari Clinic                       | 1988 to 2002 | 4084 | 48.8                             | 8.4  | 51.7*                                | NR   | Asian                   | 70% †    | NR                 | majority                          | majority  | 2.9                                 | NR   | NR                                                               |
| Sekiguchi, 2019 <sup>43</sup> | Japan            | Cohort          | National Cancer Center in Tokyo                                   | 2004 to 2013 | 1378 | 57.0*                            | 8.9* | 61.6*                                | NR   | Asian                   | 54%      | 12%                | majority                          | majority  | 4.6*                                | 1.5* | NR to 10                                                         |
| Chung, 2011 <sup>22</sup>     | Korea            | Cohort          | Seoul National University Hospital                                | 2003 to 2010 | 1242 | 56.7                             | 8.8  | 61.4*                                | NR   | Asian                   | 63%      | 7%                 | majority                          | majority  | 4.7                                 | NR   | NR to 5                                                          |
| Stock, 2013 <sup>38</sup>     | Germany          | Cohort          | practices across the state of Bavaria                             | 2006 to 2009 | 2189 | 64.5                             | 6.8  | NR                                   | NR   | Caucasian               | 44%      | NR                 | majority                          | mixed     | NR                                  | NR   | 0.5 to 3                                                         |
| Lieberman, 2007 <sup>30</sup> | USA              | Cohort          | 13 Veteran Affairs Medical Centres                                | 1994 to 2002 | 298  | 63.4                             | 7.0  | NR                                   | NR   | mixed                   | majority | 24%                | majority                          | majority  | NR                                  | NR   | 0.5 to 5.5                                                       |

Supplementary table B | Overview of studies (continued)

| First author,<br>Year            | Country /<br>Region | Study<br>type       | Setting                                                                           | Study<br>Period | N     | Age at index<br>colonoscopy<br>(years) |       | Age at follow-up<br>colonoscopy<br>(years) |      | Ethnicity<br>(%<br>Caucasian) | Male<br>(%) | Family<br>history<br>(%) | Average risk<br>screening indication |               | Interval between<br>procedures (years) |     |                                                                                      |
|----------------------------------|---------------------|---------------------|-----------------------------------------------------------------------------------|-----------------|-------|----------------------------------------|-------|--------------------------------------------|------|-------------------------------|-------------|--------------------------|--------------------------------------|---------------|----------------------------------------|-----|--------------------------------------------------------------------------------------|
|                                  |                     |                     |                                                                                   |                 |       | Mean                                   | SD    | Mean                                       | SD   |                               |             |                          | Index                                | Follow-<br>Up | Mean                                   | SD  | Range                                                                                |
| Chiu, 2015 <sup>44</sup>         | Taiwan<br>(China)   | Cohort              | National Taiwan<br>University Hospital                                            | 2003 to<br>2011 | 2419  | 58.0                                   | 6.8   | NR                                         | NR   | Asian                         | 63%         | NR                       | majority                             | majority      | NR                                     | NR  | 1 to 5                                                                               |
| Jin, 2019 <sup>45</sup>          | China               | Cohort              | Digestive Endoscopy<br>Center, General Hospital,<br>Tianjin Medical<br>University | 2010 to<br>2017 | 421   | 53.1*                                  | 12.4  | NR                                         | NR   | Asian                         | 46%         | 2.7%                     | mixed                                | mixed         | NR                                     | NR  | 1 to 5                                                                               |
| Xu, 2016 <sup>41</sup>           | China               | Cohort              | Digestive Endoscopy<br>Center, General Hospital,<br>Tianjin Medical<br>University | 2003 to<br>2013 | 408   | 57.6*                                  | 11.6* | NR                                         | NR   | Asian                         | 48%         | 13%                      | mixed                                | mixed         | NR                                     | NR  | 1 to <5                                                                              |
| Brenner,<br>2010 <sup>21</sup>   | Germany             | Cross-<br>sectional | 33 gastroenterology<br>practices across the<br>state of Saarland                  | 2005 to<br>2007 | 533   | 53.2*                                  | NR    | 65.1                                       | NR   | Caucasian                     | 42%         | 15%                      | mixed                                | majority      | 11.9                                   | NR  | 1 to >16<br>Interval subgroups‡:<br>NR NR 1 to 5<br>NR NR 6 to 10<br>NR NR 11 to >16 |
| Lieberman,<br>2014 <sup>29</sup> | USA                 | Cohort              | private practices,<br>academic VA/military,<br>all over US                        | 2000 to<br>2012 | 15719 | 59.2*                                  | NR    | NR                                         | NR   | 84%                           | 45%         | 42%                      | mixed                                | mixed         | NR                                     | NR  | 1 to <10<br>Interval subgroups‡:<br>NR NR 1 to <5<br>NR NR 5 to <10                  |
| Miller,<br>2010 <sup>32</sup>    | USA                 | Cohort              | West Haven Veterans<br>Affairs Hospital                                           | 1997 to<br>2006 | 197   | 62.0                                   | 0.5   | NR                                         | NR   | 85%                           | 99%         | 22%                      | mixed                                | mixed         | NR                                     | NR  | 4.75 to 10<br>Interval subgroups‡:<br>NR NR 4.75 to 5<br>NR NR 5 to 10               |
| Leung,<br>2009 <sup>28</sup>     | China               | Cohort              | Three Hospitals in Hong<br>Kong                                                   | 2000 to<br>2007 | 401   | 60.6                                   | 5.1   | 65.6*                                      | 5.1* | Asian                         | 44%         | 0%                       | majority                             | majority      | 5.0                                    | NR  | NR                                                                                   |
| Huang,<br>2012 <sup>24</sup>     | China               | Cohort              | Inner Mongolia Medical<br>College, Huhhot                                         | 2003 to<br>2010 | 301   | 56.5                                   | 9.2   | 61.6*                                      | 9.2* | Asian                         | 61%         | NR                       | majority                             | majority      | 5.1                                    | 0.2 | NR                                                                                   |
| Matsuda,<br>2009 <sup>31</sup>   | Japan               | Cohort              | Six hospitals in Japan<br>(Japan Polyp Study<br>Workgroup)                        | 1990 to<br>1995 | 3661  | 61.6*                                  | 9.8*  | 66.8*                                      | NR   | Asian                         | 57%         | NR                       | mixed                                | mixed         | 5.2*                                   | NR  | 3 to 12.3                                                                            |

Supplementary table B | Overview of studies (continued)

| First author, Year            | Country / Region | Study type      | Setting                                                                   | Study Period | N    | Age at index colonoscopy (years) |     | Age at follow-up colonoscopy (years) |      | Ethnicity (% Caucasian) | Male (%) | Family history (%) | Average risk screening indication |           | Interval between procedures (years) |      |            |
|-------------------------------|------------------|-----------------|---------------------------------------------------------------------------|--------------|------|----------------------------------|-----|--------------------------------------|------|-------------------------|----------|--------------------|-----------------------------------|-----------|-------------------------------------|------|------------|
|                               |                  |                 |                                                                           |              |      | Mean                             | SD  | Mean                                 | SD   |                         |          |                    | Index                             | Follow-Up | Mean                                | SD   | Range      |
| Strock, 2011 <sup>39</sup>    | Luxembourg       | Cohort          | Centre Hospitalier de Luxembourg                                          | 1994 to 2007 | 636  | 56.1*                            | NR  | 61.3*                                | NR   | Caucasian               | 51%      | NR                 | mixed                             | mixed     | 5.2                                 | NR   | NR         |
| Imperiale, 2008 <sup>25</sup> | USA              | Cohort          | Eli Lilly Screening Colonoscopy Program, seven sites in Indiana           | 1995 to 2005 | 1256 | 56.7                             | 7.5 | 62.0*                                | 7.6* | Caucasian               | 57% †    | NR                 | majority                          | majority  | 5.3                                 | 1.3  | NR         |
| Laish, 2015 <sup>27</sup>     | Israel           | Cohort          | Meir Medical Hospital and surrounding clinics                             | 1995 to 2013 | 318  | NR                               | NR  | NR                                   | NR   | Jewish                  | 43%      | 44%                | mixed                             | mixed     | 5.4*                                | 2.6* | NR         |
|                               |                  |                 |                                                                           |              |      |                                  |     |                                      |      |                         |          |                    |                                   |           | Interval subgroup¶: 11.0*           | 3.7* | NR         |
| Rex, 1996 <sup>3</sup>        | USA              | Cohort          | Indiana University Hospital                                               | NR           | 154  | 60.1*                            | NR  | 65.6                                 | NR   | mixed                   | 68% †    | 0%                 | majority                          | majority  | 5.5                                 | NR   | 3.9 to 6.8 |
| Squillace, 1994 <sup>37</sup> | USA              | Cohort          | Tucson Veteran Affairs Medical Center, Arizona                            | NR           | 29   | 57.6*                            | NR  | 63.3                                 | NR   | mixed                   | 97%      | 10%                | mixed                             | majority  | 5.7                                 | NR   | 5 to NR    |
| Kruse, 2015 <sup>8</sup>      | USA              | Cohort          | Harvard Vanguard Medical Associates, 17 ambulatory sites in Massachusetts | 2001 to 2010 | 433  | 53.0                             | NR  | 59.5*                                | NR   | 77%                     | 48%      | NR                 | majority                          | majority  | 6.5*                                | NR   | NR         |
| Ponugoti, 2017 <sup>35</sup>  | USA              | Cross-sectional | Indiana University Hospital and affiliated outpatient endoscopy units     | 1999 to 2015 | 378  | 56.7                             | 5.5 | 66.4                                 | 5.6  | mixed                   | 42% †    | 0%                 | majority                          | majority  | 9.7                                 | 1.2  | 8 to 15    |
| Rex, 2018 <sup>36</sup>       | USA              | Cross-sectional | outpatient endoscopy unit, private practice, Atlanta                      | 2002 to 2015 | 470  | 53.5                             | 3.7 | 64.0                                 | 3.9  | 85%                     | 46% †    | NR                 | majority                          | majority  | 10.4                                | 1.1  | 8 to 15    |
|                               |                  |                 |                                                                           |              |      |                                  |     |                                      |      |                         |          |                    |                                   |           | Interval subgroups‡: NR             | NR   | 8 to 10    |
|                               |                  |                 |                                                                           |              |      |                                  |     |                                      |      |                         |          |                    |                                   |           | NR                                  | NR   | 10 to 15   |

Studies are ordered by interval between procedures. Studies with interval subgroups are ranked according to where the first interval subgroup is available.

NR=not reported; SD=standard deviation.

Italic: best approximation; \*: own calculation.

†: sex-specific analyses available.

‡: interval-specific analyses available.

¶: subgroup with two previously negative colonoscopies available.

Supplementary table C | Fulfilment of quality criteria

| Author, Year    | RP | RI | ABC | AFC | FUR | LFU | Sum |
|-----------------|----|----|-----|-----|-----|-----|-----|
| Park, 2015      | +  | -  | +   | +   | -   | -   | 3   |
| de Jong, 2005   | -  | +  | +   | +   | +   | +   | 5   |
| Avidan, 2002    | -  | +  | +   | +   | +   | ++  | 6   |
| Kim, 2014       | +  | -  | +   | +   | -   | -   | 3   |
| Suh, 2014       | -  | -  | +   | +   | -   | -   | 2   |
| Neugut, 1995    | +  | -  | +   | +   | +   | -   | 4   |
| Yamaji, 2004    | +  | +  | +   | +   | -   | -   | 4   |
| Sekiguchi, 2019 | +  | +  | +   | +   | +   | -   | 5   |
| Chung, 2011     | +  | +  | +   | +   | +   | +   | 6   |
| Stock, 2013     | +  | -  | -   | -   | +   | -   | 2   |
| Lieberman, 2007 | -  | +  | +   | +   | +   | +   | 5   |
| Chiu, 2015      | +  | +  | +   | +   | +   | -   | 5   |
| Jin, 2019       | +  | -  | +   | +   | +   | -   | 4   |
| Xu, 2016        | +  | -  | +   | +   | +   | -   | 4   |
| Brenner, 2010   | +  | +  | -   | +   | ++  | -   | 5   |
| Lieberman, 2014 | +  | -  | +   | +   | +   | -   | 4   |
| Miller, 2010    | -  | -  | +   | +   | +   | -   | 3   |
| Leung, 2009     | +  | +  | +   | +   | -   | ++  | 6   |
| Huang, 2012     | +  | +  | +   | +   | -   | ++  | 6   |
| Matsuda, 2009   | -  | -  | +   | +   | +   | -   | 3   |
| Strock, 2011    | +  | -  | +   | +   | -   | -   | 3   |
| Imperiale, 2008 | +  | +  | +   | +   | -   | +   | 5   |
| Laish, 2015     | -  | -  | +   | +   | -   | -   | 2   |
| Rex, 1996       | +  | +  | +   | +   | +   | -   | 5   |
| Squillace, 1994 | -  | +  | +   | +   | -   | -   | 3   |
| Kruse, 2015     | +  | +  | +   | +   | -   | -   | 4   |
| Ponugoti, 2017  | +  | +  | -   | -   | +   | -   | 3   |
| Rex, 2018       | +  | +  | +   | +   | ++  | -   | 6   |
| <i>Sum</i>      | 20 | 16 | 25  | 26  | 19  | 10  |     |

RP - representative for the general population at average risk for colorectal cancer.

RI - representative for a population with screening as only indication for colonoscopy.

ABC - Ascertainment of index colonoscopy outcome by medical record or structured interview.

AFC - Assessment of follow-up colonoscopy outcome by independent assessment or record linkage (medical record).

FUR - range between procedures reported and interval in line with guideline recommendation.

LFU – proportion of subjects who had a negative index colonoscopy and also underwent a follow-up colonoscopy reported and adequate (i.e. number of subjects with negative index colonoscopy and follow-up colonoscopy divided by the number of all subjects with negative index colonoscopy in the study > 50% (one star) or >80% (two stars))

## Quality Rating Manual - MODIFIED NEWCASTLE - OTTAWA QUALITY ASSESSMENT SCALE

In total 9 points can be awarded.

### Selection

#### 1) Representativeness of the cohort - population

- a) truly representative of the general population at average risk for colorectal cancer with negative index colonoscopy in the community ✱
- b) somewhat representative of the general population at average risk for colorectal cancer with negative index colonoscopy in the community ✱
- c) selected group of users eg nurses, volunteers
- d) no description of the cohort

*Coding manual: Item is assessing the representativeness of the subjects in the community. For example, small studies (N < 100) or studies recruited in single centre studies will only be somewhat representative. Studies exclusively recruited in Veteran Affairs Centres are a selected group.*

#### 2) Representativeness of the cohort - indication

- a) truly representative of a population with screening indication ✱
- b) somewhat representative of a population with screening indication ✱
- c) population included both subjects with and without screening indication
- d) no adequate description of indication characteristics

*Coding manual: Item is assessing the representativeness of the study regarding the proportion of subjects with screening as single indication for follow-up colonoscopy. For example, a country-wide study where subjects were invited for re-screening and symptomatic subjects were excluded from the analysis is likely truly representative of a population with screening indication. In contrast, a study in a single hospital where presentation for colonoscopy was opportunistic and symptomatic subjects were not excluded, or no statement in this regard can be derived, is likely not representative.*

#### 3) Ascertainment of index colonoscopy outcome

- a) secure record (medical record) ✱
- b) structured interview ✱
- c) self report
- d) no description

*Coding manual: how were the findings at index colonoscopy determined? Was it clearly reported?*



## Outcome

### 4) Assessment of follow-up colonoscopy outcome

- a) independent blind assessment \*
- b) record linkage (medical record) \*
- c) self report
- d) no description

*Coding manual: how were the findings at follow-up colonoscopy determined? Was it clearly reported?*

### 5) Adequacy of follow-up length

- a) range of follow-up interval reported, and mean / range above 10 for at least one subgroup \*\*
- b) range of follow-up interval reported, and mean / range between 5 and 10 years \*
- c) range of follow-up interval reported, and mean / range between 1 and 5 years \*
- d) range of follow-up interval not reported

*Coding manual: major American and European guidelines recommend an interval of 10 years for follow-up screening colonoscopy after negative index colonoscopy. The range between the procedures is central to answer the research question, and stars will only be allocated if the range was reported for at least one subgroup. Mean intervals and their standard deviations will only be used as an approximation. Accordingly, two stars are awarded if at least one subgroup was reported with a mean / range of more than 10 years. As mixed populations including subjects with diagnostic colonoscopy are allowed and these subjects might require an earlier examination, one star is awarded if the range was reported and the interval was between 5 to 10 or 1 to 5 years, respectively.*

### 6) Lost to follow-up

- a) proportion of subjects who had a negative index colonoscopy and returned for follow-up colonoscopy reported and high (>80%) \*\*
- b) proportion of subjects who had a negative index colonoscopy and returned for follow-up colonoscopy reported and moderate (50 % to 80%) \*
- c) proportion of subjects who had a negative index colonoscopy and returned for follow-up colonoscopy reported and small (<50%)
- c) proportion of subjects who had a negative index colonoscopy and returned for follow-up colonoscopy not reported

*Coding manual: ideally, all subjects would be systematically referred for follow-up colonoscopy, i.e. all of those who had a negative index colonoscopy would also return for the follow-up colonoscopy. If the proportion of subjects returning for the follow-up colonoscopy is low, selection bias may be assumed, as subjects who return are potentially not average risk subjects. For instance, they may be particularly concerned about their health status, i.e. live potentially healthier than the average, or have a diagnostic reason for their return.*

## Reference

Wells G SB, O'Connell D, Peterson J, Welch V, Losos M, Tugwell P. The Newcastle-Ottawa Scale (NOS) for assessing the quality of nonrandomised studies in meta-analyses: Ottawa Hospital Research Institute. Department of Epidemiology and Community Medicine; 2013 [Available from: [www.ohri.ca/programs/clinical\\_epidemiology/oxford.asp](http://www.ohri.ca/programs/clinical_epidemiology/oxford.asp) accessed 4 Sept 2019].

Supplementary table D | **Descriptive statistics**

|                                         | Number of studies | Range        | Quantile |      |      |
|-----------------------------------------|-------------------|--------------|----------|------|------|
|                                         |                   |              | 25%      | 50%  | 75%  |
| Prevalence of any neoplasm (%)          |                   |              |          |      |      |
| One to five years                       | 16                | 4.9 to 40.4  | 15.6     | 21.4 | 24.5 |
| Five to ten years                       | 13                | 7.4 to 41.4  | 20.4     | 22.4 | 27.2 |
| More than ten years                     | 3                 | 15.8 to 22.2 | -        | -    | -    |
| Prevalence of any advanced neoplasm (%) |                   |              |          |      |      |
| One to five years                       | 14                | 0.7 to 7.0   | 2.1      | 2.8  | 4.3  |
| Five to ten years                       | 15                | 0.6 to 9.4   | 1.6      | 3.6  | 5.0  |
| More than ten years                     | 3                 | 5.6 to 8.0   | -        | -    | -    |
| Cancers                                 |                   |              |          |      |      |
|                                         | Number of studies | Prevalence   |          |      |      |
|                                         |                   | 0%           | <1%      | <2%  | <3%  |
| One to five years                       | 13                | 6            | 6        | 1    | 0    |
| Five to ten years                       | 14                | 10           | 3        | 0    | 1    |
| More than ten years                     | 3                 | 2            | 0        | 0    | 1    |

Supplementary table E | **Overview of meta-analyses and sensitivity analyses. Summary estimates are based on random effects models unless stated otherwise.**

### 1 | Primary analyses

| Analysis set                                                       | One to five years   |                     | Five to ten years   |                     | More than ten years   |                     |
|--------------------------------------------------------------------|---------------------|---------------------|---------------------|---------------------|-----------------------|---------------------|
|                                                                    | ANN (%)<br>(95% CI) | ADN (%)<br>(95% CI) | ANN (%)<br>(95% CI) | ADN (%)<br>(95% CI) | ANN (%)<br>(95% CI)   | ADN (%)<br>(95% CI) |
| All cohorts                                                        |                     |                     |                     |                     |                       |                     |
| No of cohorts                                                      | 16                  | 14                  | 13                  | 15                  | 3                     | 3                   |
| Summary estimate                                                   | 20.7 (15.8 to 25.5) | 2.8 (2.0 to 3.7)    | 23.0 (18.0 to 28.0) | 3.2 (2.2 to 4.1)    | 21.9 (14.9 to 29.0)   | 7.0 (5.3 to 8.7) +  |
| Heterogeneity:<br>I <sup>2</sup> (%) / $\tau^2$ / P value          | 99/0.009/<0.001     | 94/0.014/<0.001     | 97/0.007/<0.001     | 89/0.000/<0.001     | 85/0.003/0.001        | 0/0.000/0.45        |
| Cohorts where the majority of subjects had screening as indication |                     |                     |                     |                     |                       |                     |
| No of cohorts                                                      | 8                   | 7                   | 9                   | 9                   | 2                     | 2                   |
| Summary estimate                                                   | 17.2 (12.0 to 22.4) | 1.4 (0.9 to 1.9)    | 27.1 (21.1 to 33.1) | 2.7 (1.6 to 3.7)    | 25.3 (21.9 to 28.8) + | 6.8 (4.4 to 9.2) +  |
| Heterogeneity:<br>I <sup>2</sup> (%) / $\tau^2$ / P value          | 98/0.005/<0.001     | 72/0.000/0.001      | 93/0.007/<0.001     | 81/0.000/<0.001     | 61/0.001/0.11         | 31/0.000/0.23       |

ANN = prevalence of any neoplasm. ADN = prevalence of any advanced neoplasm. CI = confidence interval

+ fixed effects model.

P values are based on Cochran's Q statistic.

## 2 | Sensitivity analyses for all cohorts

| Type of sensitivity analysis                  | One to five years   |                     | Five to ten years     |                     |
|-----------------------------------------------|---------------------|---------------------|-----------------------|---------------------|
|                                               | ANN (%)<br>(95% CI) | ADN (%)<br>(95% CI) | ANN (%)<br>(95% CI)   | ADN (%)<br>(95% CI) |
| Mainly Asian                                  |                     |                     |                       |                     |
| No of cohorts                                 | 8                   | 9                   | 3                     | 6                   |
| Summary estimate                              | 24.1 (16.8 to 31.3) | 2.4 (1.5 to 3.2)    | 23.8 (21.2 to 26.4) † | 3.7 (1.8 to 5.6)    |
| Heterogeneity: $I^2$ (%) / $\tau^2$ / P value | 99/0.001 / <0.001   | 92/0.000 / <0.001   | 51/0.001 / 0.13       | 89/0.000 / <0.001   |
| Mainly Caucasian                              |                     |                     |                       |                     |
| No of cohorts                                 | 8                   | 5                   | 10                    | 9                   |
| Summary estimate                              | 16.8 (11.6 to 22.1) | 3.5 (3.1 to 3.8) †  | 22.6 (17.0 to 28.2)   | 3.0 (1.8 to 4.2)    |
| Heterogeneity: $I^2$ (%) / $\tau^2$ / P value | 97/0.005 / <0.001   | 49/0.000 / 0.10     | 97/0.007 / <0.001     | 90/0.000 / <0.001   |

ANN = prevalence of any neoplasm. ADN = prevalence of any advanced neoplasm. CI = confidence interval

† fixed effects model.

P values are based on Cochran's Q statistic.

### 3 | Sensitivity analyses for cohorts where the majority of subjects had screening as indication

| Type of sensitivity analysis                  | One to five years   |                     | Five to ten years     |                     |
|-----------------------------------------------|---------------------|---------------------|-----------------------|---------------------|
|                                               | ANN (%)<br>(95% CI) | ADN (%)<br>(95% CI) | ANN (%)<br>(95% CI)   | ADN (%)<br>(95% CI) |
| Mainly Asian                                  |                     |                     |                       |                     |
| No of cohorts                                 | 4                   | 4                   | 2                     | 2                   |
| Summary estimate                              | 18.3 (11.1 to 25.4) | 1.2 (0.7 to 1.6)    | 25.6 (22.4 to 28.8) † | 1.6 (0.7 to 2.5) †  |
| Heterogeneity: $I^2$ (%) / $\tau^2$ / P value | 99/0.005 / <0.001   | 73/0.000/0.01       | 0/0.000/0.40          | 0/0.000/0.86        |
| Mainly Caucasian                              |                     |                     |                       |                     |
| No of cohorts                                 | 4                   | 3                   | 7                     | 7                   |
| Summary estimate                              | 16.1 (6.6 to 25.5)  | 2.1 (1.4 to 2.8) †  | 27.7 (19.6 to 35.8)   | 3.1 (1.7 to 4.5)    |
| Heterogeneity: $I^2$ (%) / $\tau^2$ / P value | 94/0.009 / <0.001   | 0/0.000/0.42        | 94/0.011 / <0.001     | 85/0.000 / <0.001   |

ANN = prevalence of any neoplasm. ADN = prevalence of any advanced neoplasm. CI = confidence interval

† fixed effects model.

P values are based on Cochran's Q statistic.

Supplementary figures | Funnel plots

Figure A | All studies

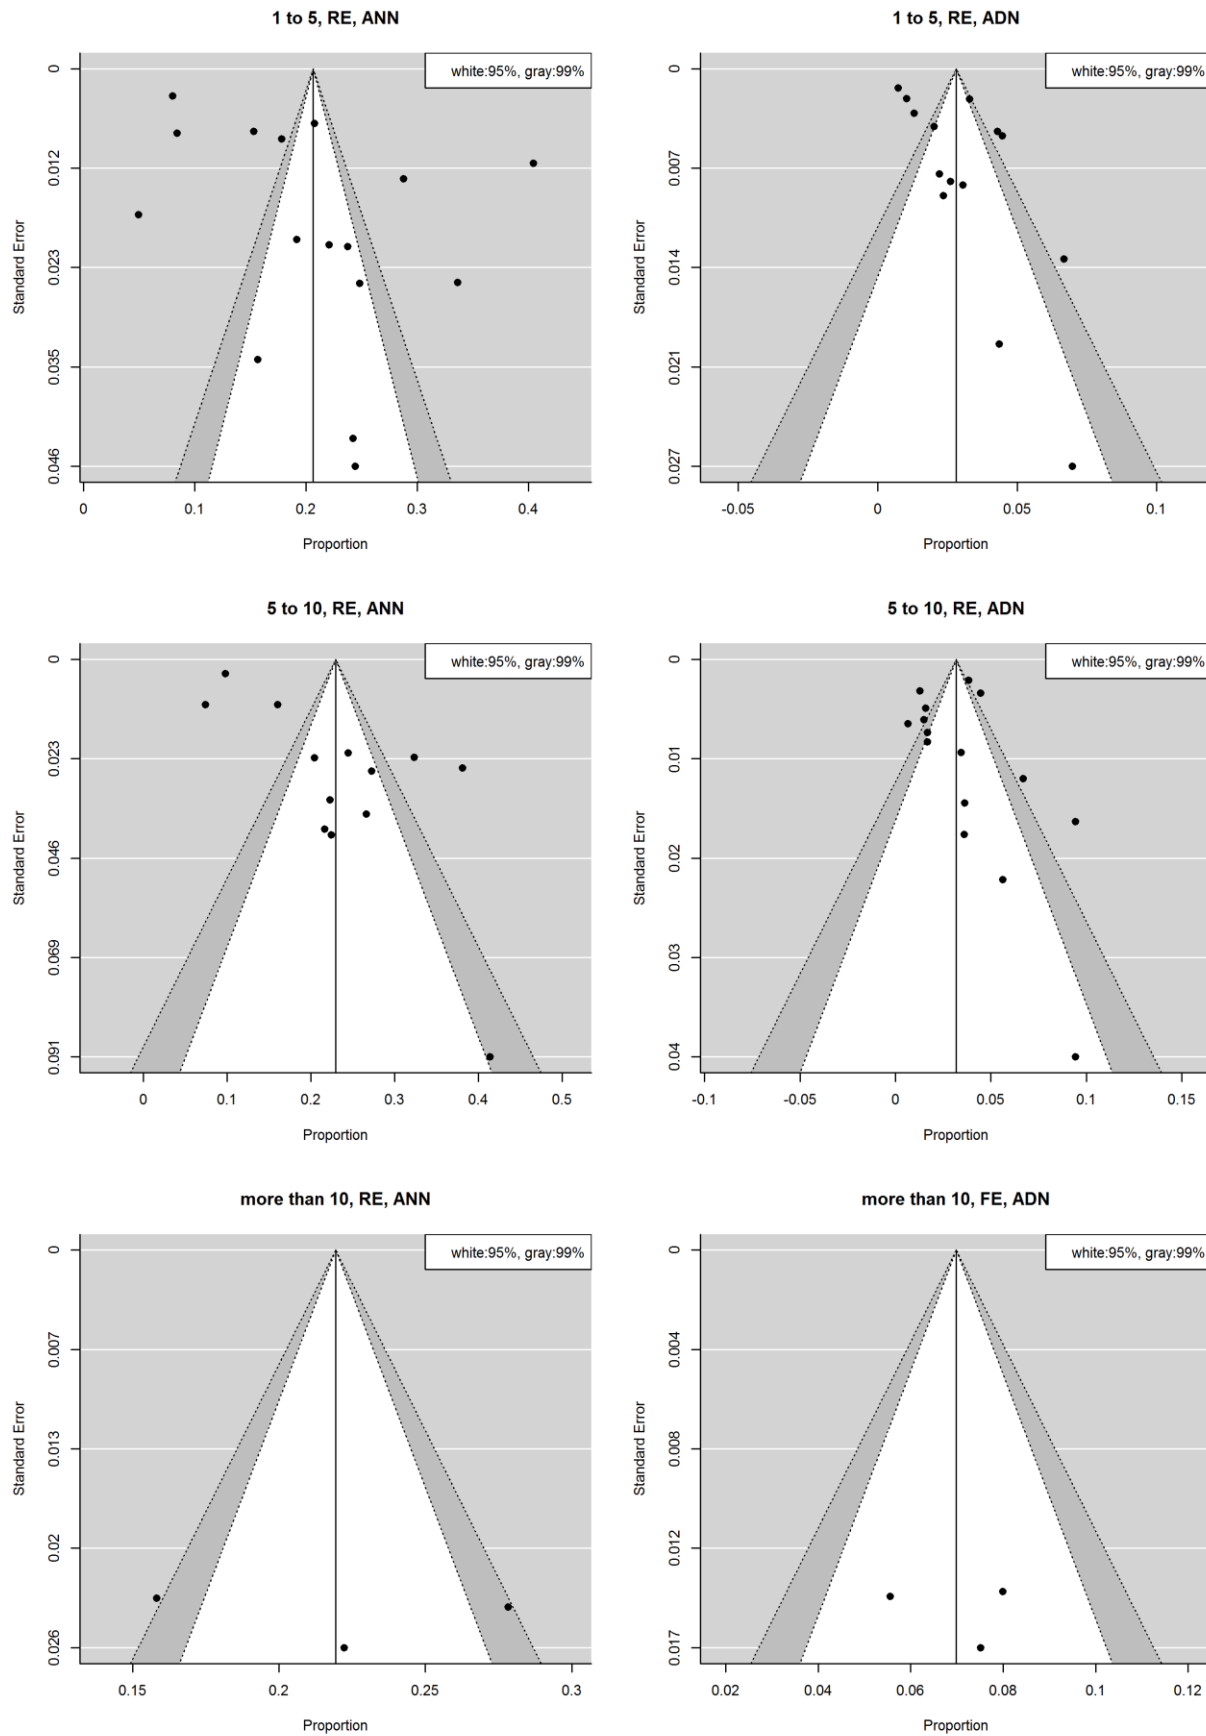

ANN: prevalence of any neoplasm. ADN: prevalence of any advanced neoplasm. RE: random effects model. FE: fixed effects model

Figure B | Studies where the majority of subjects had screening as indication

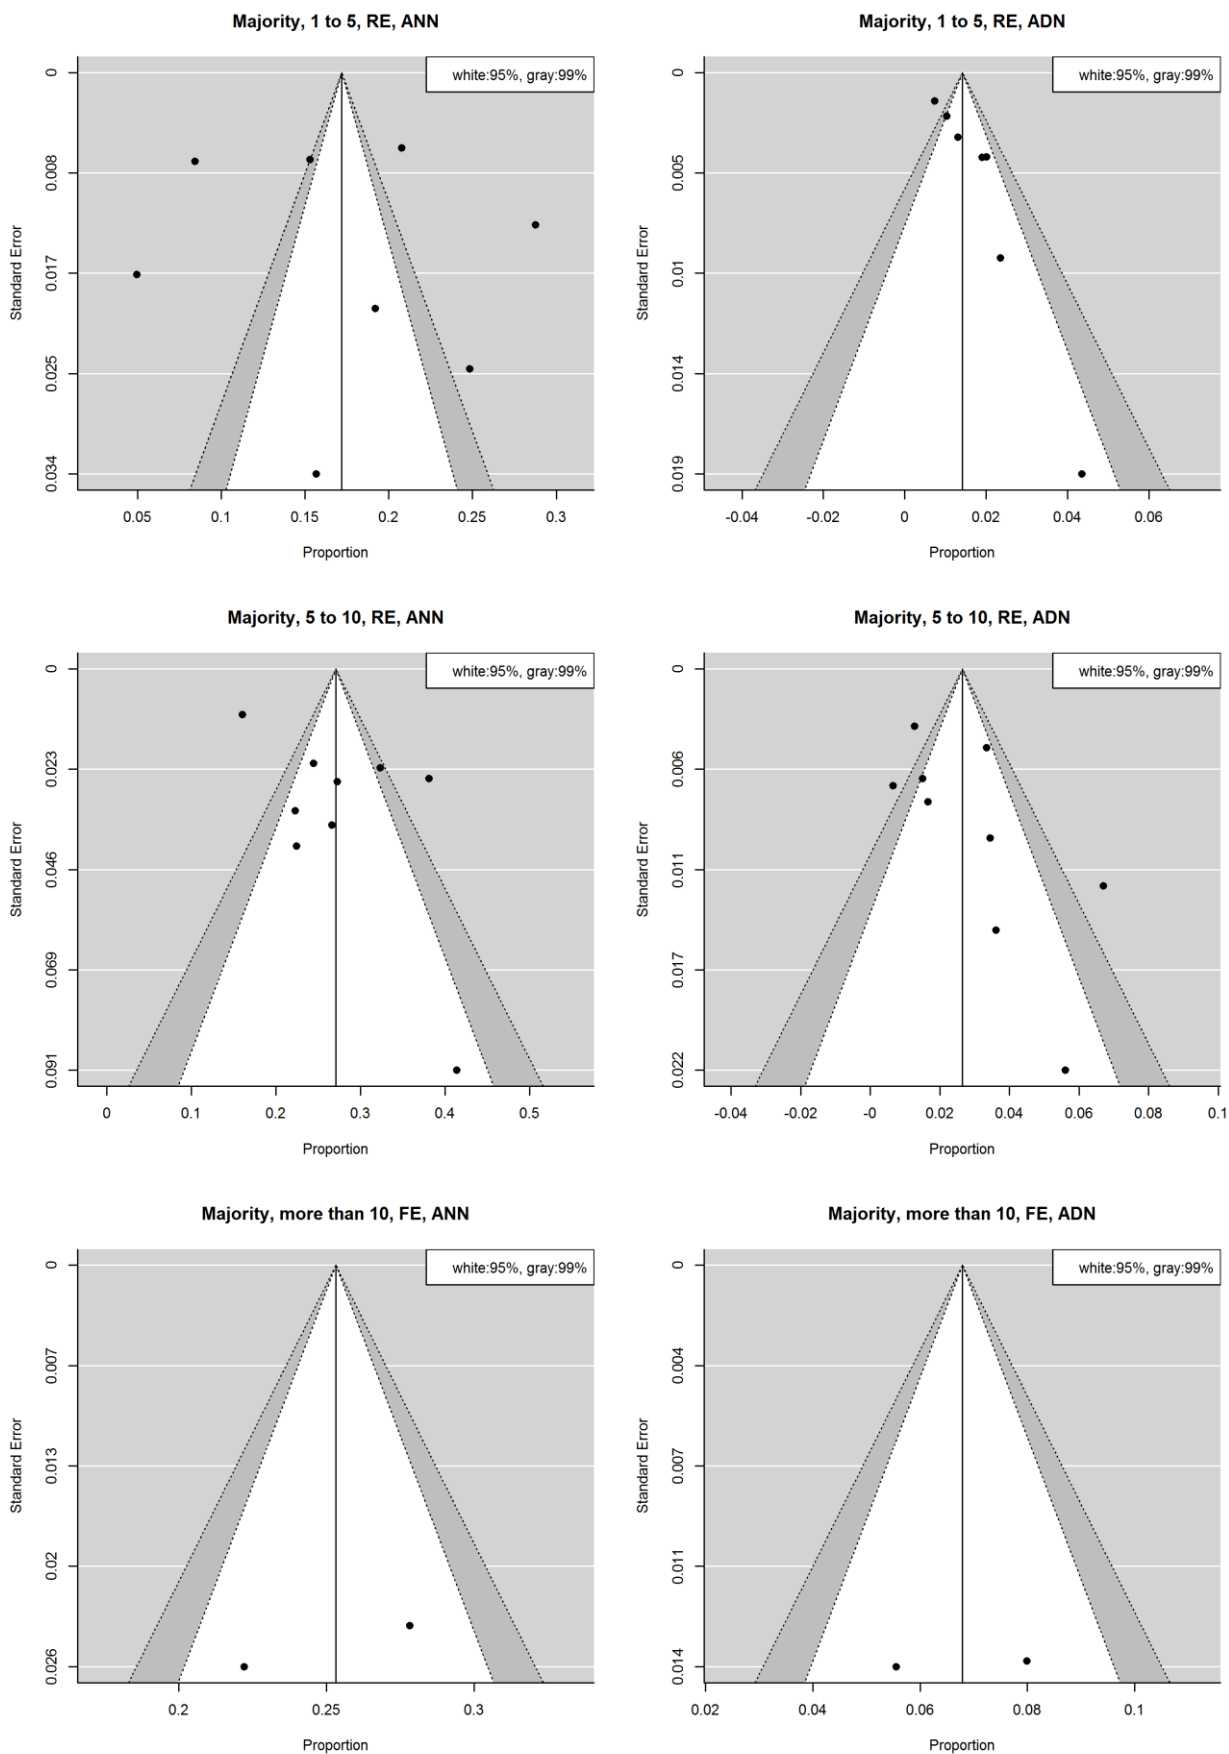

ANN: prevalence of any neoplasm. ADN: prevalence of any advanced neoplasm. RE: random effects model. FE: fixed effects model



Figure C | By sex

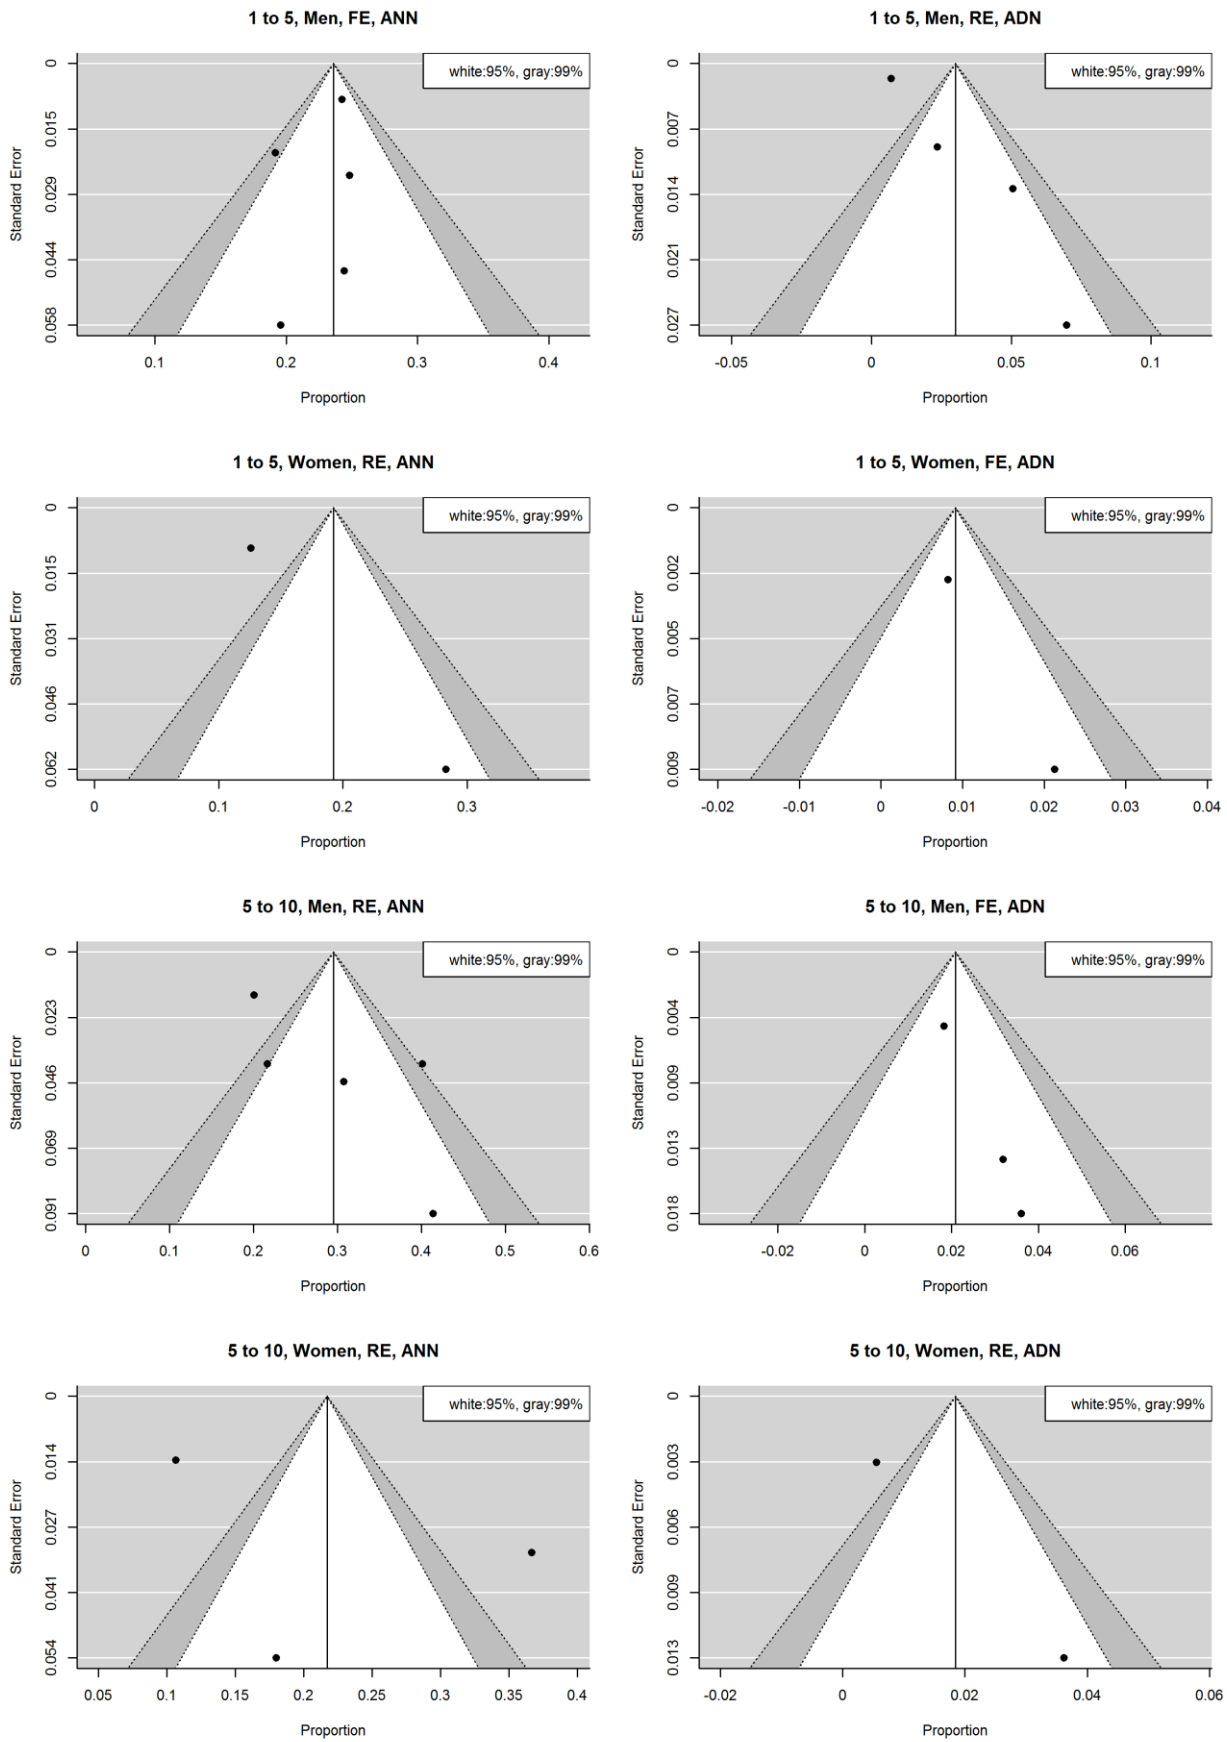

ANN: prevalence of any neoplasm. ADN: prevalence of any advanced neoplasm. RE: random effects model. FE: fixed effects mode
